# Supplementary material for: The effect of the timing of exposure to Campylobacter jejuni on the gut microbiome and inflammatory responses of broiler chickens
Source: PubMed Central journal article supplement (PMC5948730; doi:10.1186/s40168-018-0477-5), 2018-05-12
Supplement: 40168_2018_477_MOESM5_ESM.pdf [file 40168_2018_477_MOESM5_ESM.pdf]

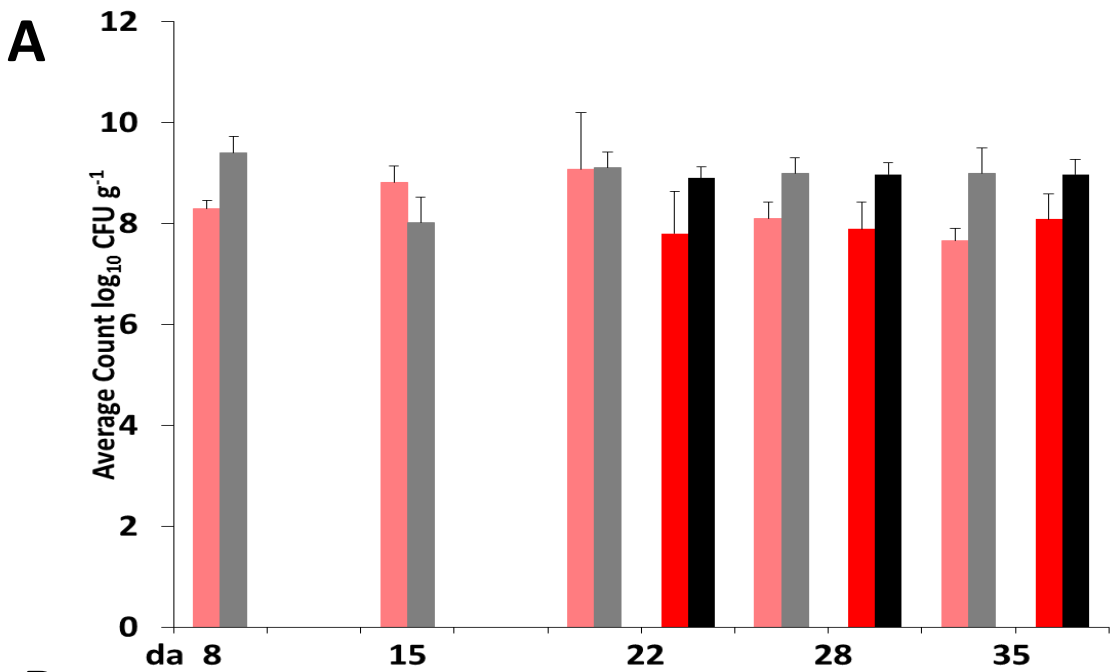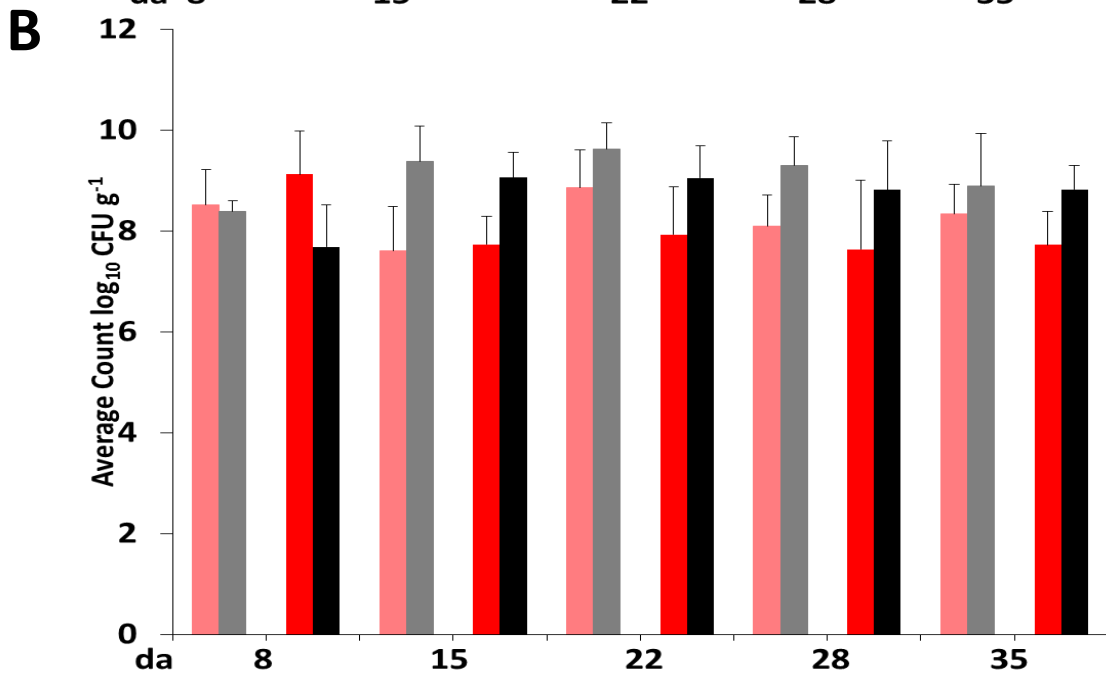

- Non-infected coliform count
- Non-infected lactic acid bacteria count
- Infected coliform count
- Infected lactic bacteria count

**Additional File 4. Coliform and lactic acid bacteria counts in the cecal lumen.** Error bars are standard deviations. A) Early cohort (TEG) infected at 6 da; B) Late cohort (TLG) infected at 20 da.
