# Supplementary material for: The effect of the timing of exposure to Campylobacter jejuni on the gut microbiome and inflammatory responses of broiler chickens
Source: PubMed Central journal article supplement (PMC5948730; doi:10.1186/s40168-018-0477-5), 2018-05-12

inf un

TEG day 8

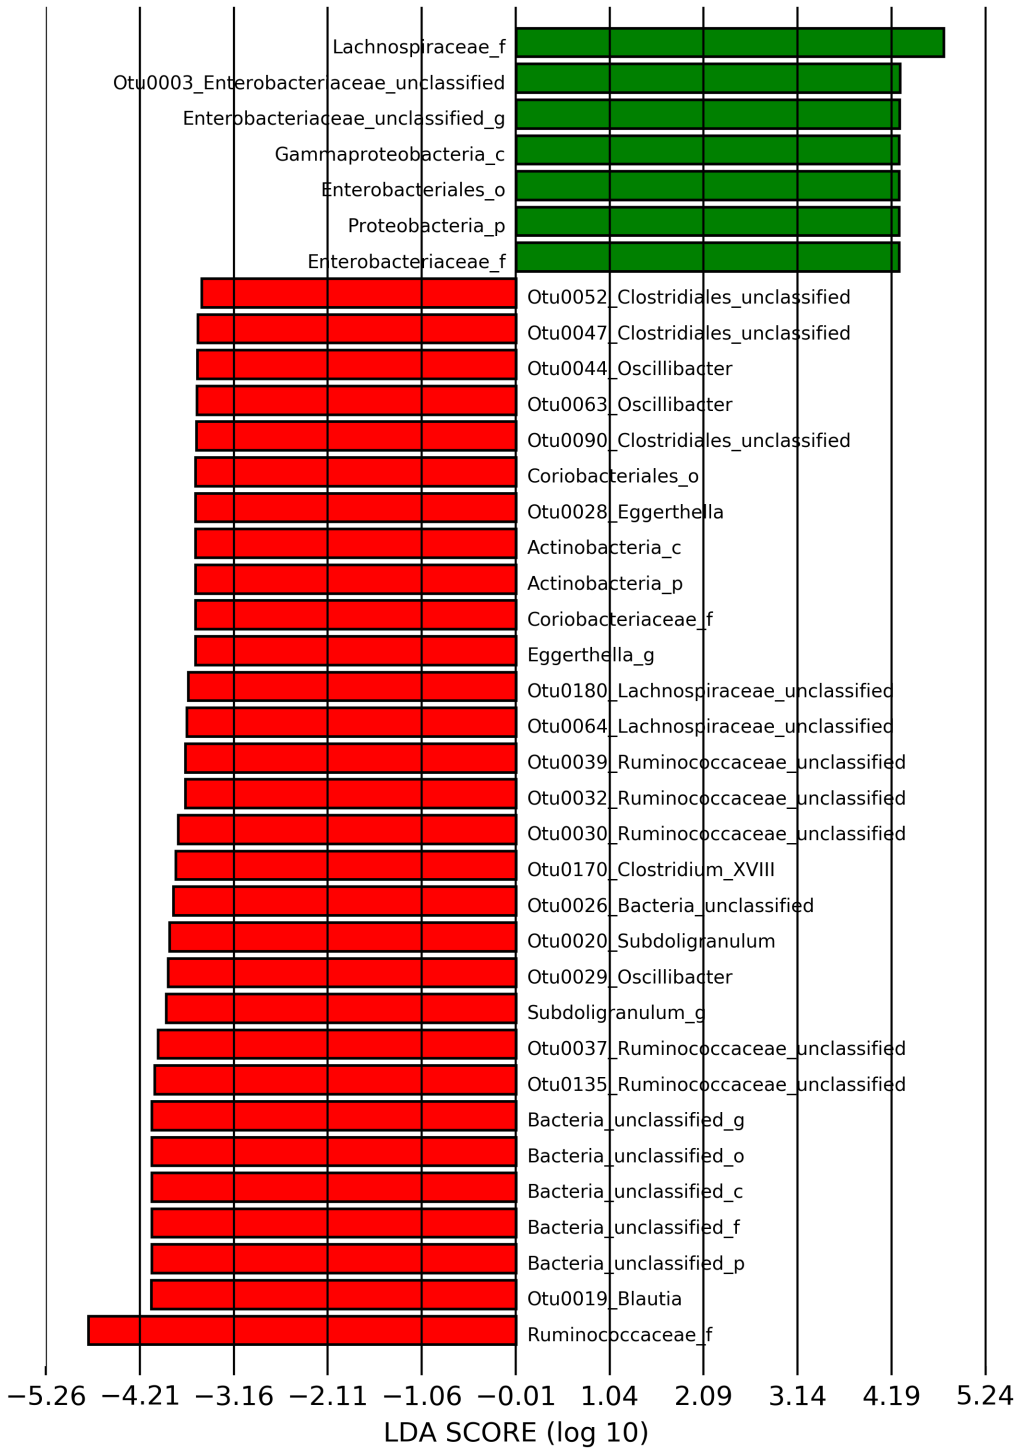

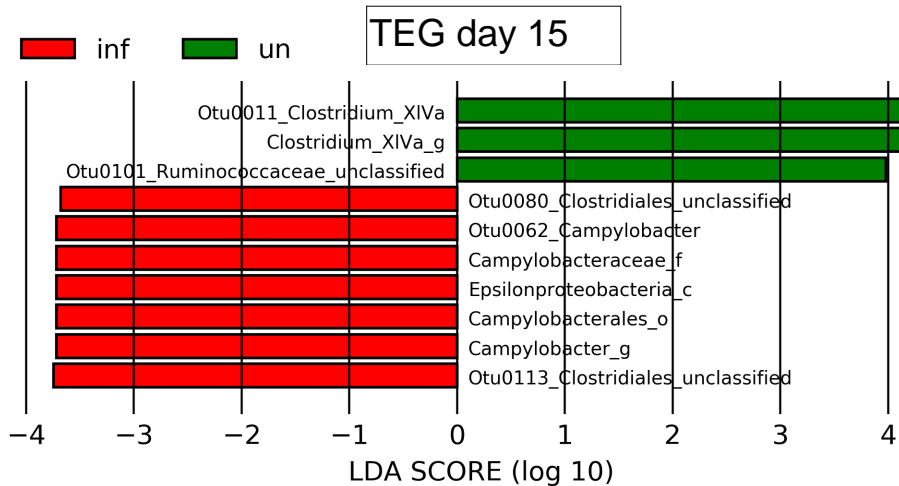

■ inf    ■ un    TEG day 22

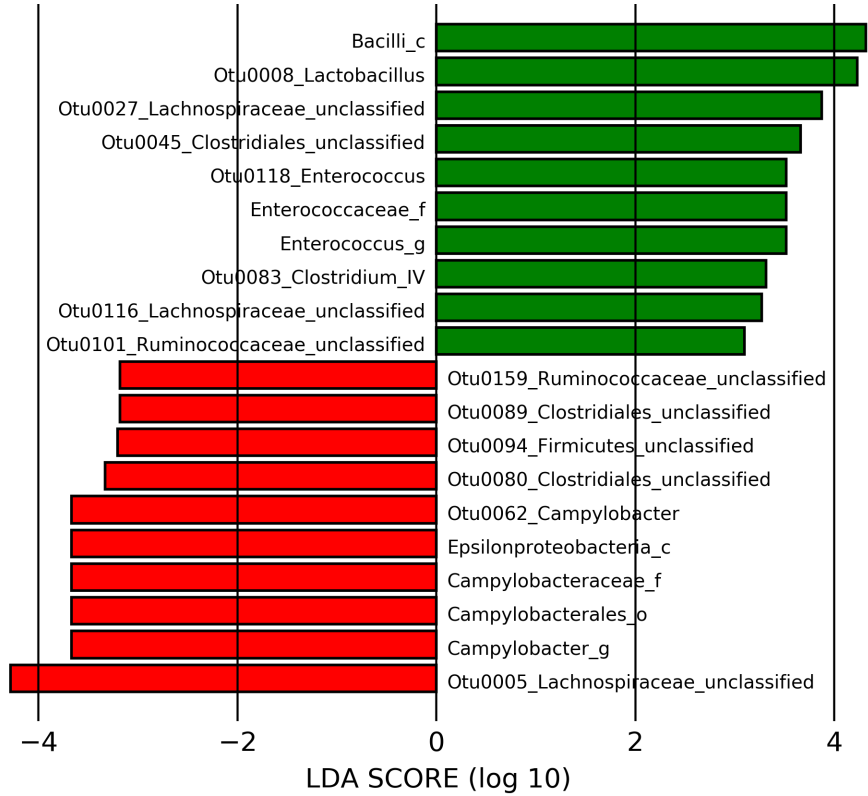

inf un

# TEG day 28

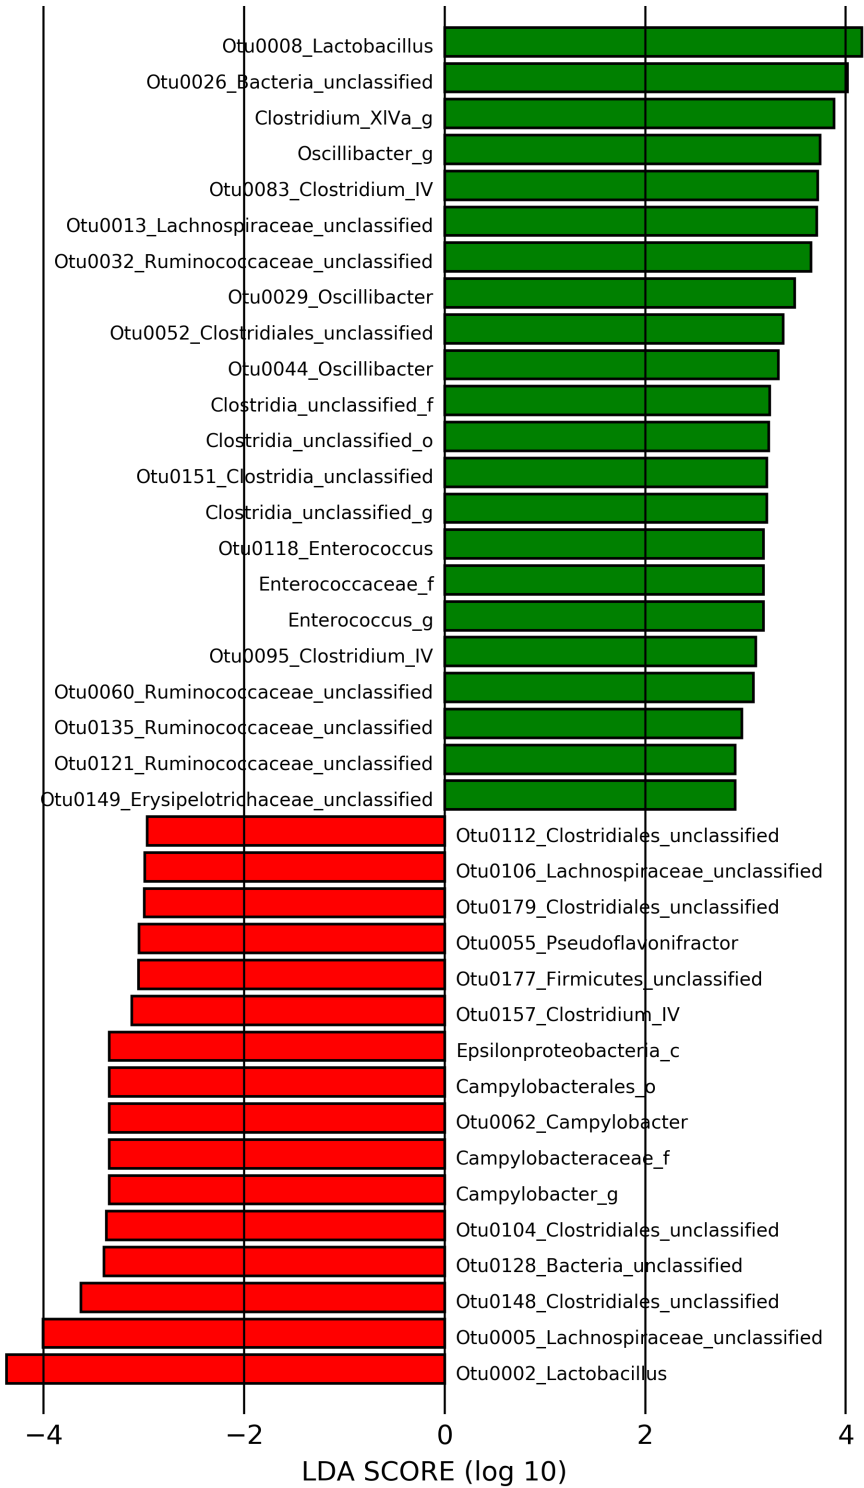

# TEG day 35

inf un

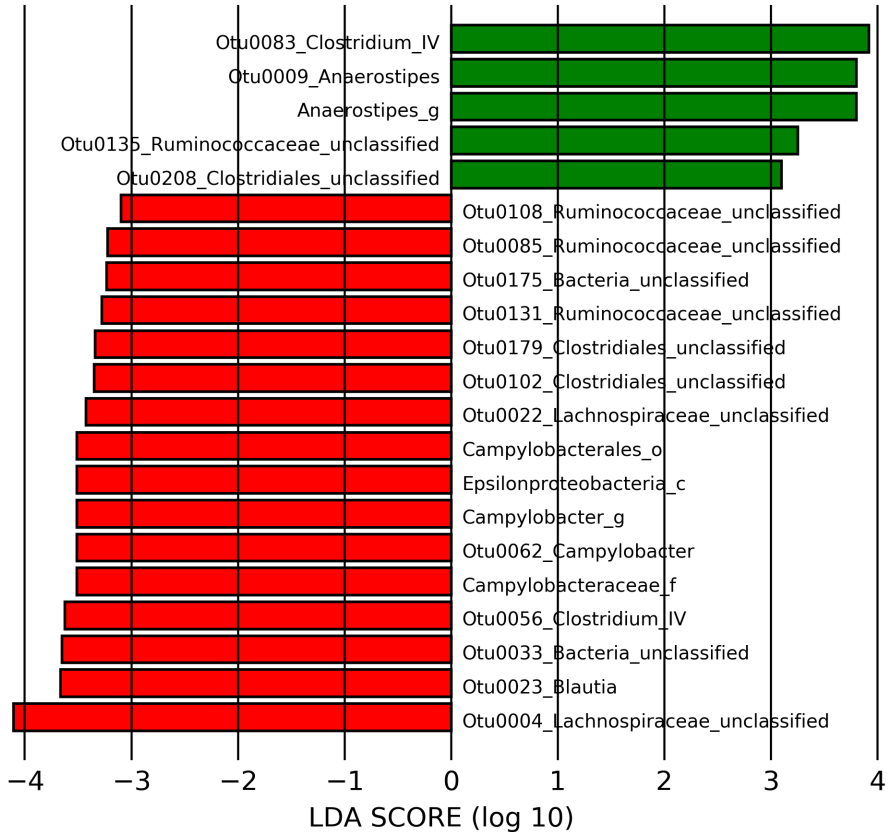

Supplement: 40168_2018_477_MOESM6_ESM.pdf [file 40168_2018_477_MOESM6_ESM.pdf]
